# Supplementary material
Source: HighWire-hosted journal article supplement (https://cmaj.ca/highwire/filestream/148520/field_highwire_adjunct_files/5/220717-res-6-at.pdf)
Supplement: 220717-res-6-at.pdf [file 220717-res-6-at.pdf]

Appendix 6 (as supplied by authors): Supplemental Cascade of Care Findings

**Table S10. Demographic and clinical characteristics of Status First Nations people in Ontario at first treatment dispensation date for the cascade measured until December 31, 2013 and December 31, 2018.**

| Characteristic                                                                             | Initiated Treatment by December 31, 2013 | Initiated Treatment by December 31, 2018 |
|--------------------------------------------------------------------------------------------|------------------------------------------|------------------------------------------|
| Total, N                                                                                   | N=207                                    | N=1,002                                  |
| Age at treatment start, years (Mean ± SD)                                                  | 44.0 ± 10.1                              | 43.7 ± 12.5                              |
| Age at treatment start, years (Median (IQR))                                               | 45 (37-52)                               | 44 (33-54)                               |
| <b>Age at treatment start, years, N (% of total in stage)</b>                              |                                          |                                          |
| 0-24                                                                                       | 8 (3.9%)                                 | 55 (5.5%)                                |
| 25-29                                                                                      | 13 (6.3%)                                | 97 (9.7%)                                |
| 30-34                                                                                      | 17 (8.2%)                                | 126 (12.6%)                              |
| 35-39                                                                                      | 27 (13.0%)                               | 112 (11.2%)                              |
| 40-44                                                                                      | 36 (17.4%)                               | 123 (12.3%)                              |
| 45-49                                                                                      | 42 (20.3%)                               | 135 (13.5%)                              |
| 50-54                                                                                      | 31 (15.0%)                               | 127 (12.7%)                              |
| 55+                                                                                        | 33 (15.9%)                               | 227 (22.7%)                              |
| <b>Birth cohort, N (% of total in stage)</b>                                               |                                          |                                          |
| <1945                                                                                      | <=5                                      | 9 (0.9%)                                 |
| 1945 to 1964                                                                               | 110 (53.1%)                              | 347 (34.6%)                              |
| 1965 to 1975                                                                               | 59 (28.5%)                               | 260 (25.9%)                              |
| >1975                                                                                      | <=37                                     | 386 (38.5%)                              |
| <b>Sex, N (% of total in stage)</b>                                                        |                                          |                                          |
| Female                                                                                     | 98 (47.3%)                               | 444 (44.3%)                              |
| Male                                                                                       | 109 (52.7%)                              | 558 (55.7%)                              |
| <b>Urbanicity at treatment start, N (% of total in stage)</b>                              |                                          |                                          |
| Missing/Unknown                                                                            | 0 (0.0%)                                 | 11 (1.1%)                                |
| Urban                                                                                      | 170 (82.1%)                              | 722 (72.1%)                              |
| Rural                                                                                      | 37 (17.9%)                               | 269 (26.8%)                              |
| <b>Community status at treatment start, N (% of total in stage)</b>                        |                                          |                                          |
| Missing/Unknown*                                                                           | 6 (2.9%)                                 | <=5                                      |
| Outside of First Nations community                                                         | 183 (88.4%)                              | 822 (82.0%)                              |
| Within First Nations community                                                             | 18 (8.7%)                                | <=179                                    |
| <b>LHIN at treatment start, N (% of total in stage)</b>                                    |                                          |                                          |
| Missing/Unknown                                                                            | 0 (0.0%)                                 | 0 (0.0%)                                 |
| 1. Erie St Clair                                                                           | 15 (7.2%)                                | 46 (4.6%)                                |
| 2. South West                                                                              | 20 (9.7%)                                | 79 (7.9%)                                |
| 3. Waterloo Wellington                                                                     | 6 (2.9%)                                 | 13 (1.3%)                                |
| 4. Hamilton Niagara Haldimand Brant                                                        | 20 (9.7%)                                | 95 (9.5%)                                |
| 5. Central West                                                                            | <=5                                      | <=9                                      |
| 6. Mississauga Halton                                                                      | <=5                                      | <=5                                      |
| 7. Toronto Central                                                                         | 25 (12.1%)                               | 87 (8.7%)                                |
| 8. Central                                                                                 | 9 (4.3%)                                 | 16 (1.6%)                                |
| 9. Central East                                                                            | 18 (8.7%)                                | 43 (4.3%)                                |
| 10. South East                                                                             | 10 (4.8%)                                | 32 (3.2%)                                |
| 11. Champlain                                                                              | <=5                                      | 34 (3.4%)                                |
| 12. North Simcoe Muskoka                                                                   | <=5                                      | 36 (3.6%)                                |
| 13. North East                                                                             | 47 (22.7%)                               | 200 (20.0%)                              |
| 14. North West                                                                             | 28 (13.5%)                               | 311 (31.0%)                              |
| <b>Type of treatment at first dispensation record, N (% of total in stage)<sup>†</sup></b> |                                          |                                          |
| Record of Interferon regimen at treatment start                                            | <=77                                     | 78 (7.8%)                                |
| Record of DAA regimen at treatment start                                                   | <=5                                      | 417 (41.6%)                              |

Appendix 6, as submitted by the authors. Appendix to: Mendlowitz AB, Bremner KE, Krahn M, et al. Characterizing the cascade of care for hepatitis C virus infection among Status First Nations peoples in Ontario: a retrospective cohort study. *CMAJ* 2023. doi: 10.1503/cmaj.220717. Copyright © 2023 The Author(s) or their employer(s). To receive this resource in an accessible format, please contact us at cmajgroup@cmaj.ca.

|                                                                                                  |               |               |
|--------------------------------------------------------------------------------------------------|---------------|---------------|
| Missing/Unknown <sup>‡</sup>                                                                     | 129 (62.3%)   | 509 (50.8%)   |
| <b>Comorbidities</b>                                                                             |               |               |
| ADG score up to one year prior to treatment start, mean $\pm$ SD                                 | 5.6 $\pm$ 3.6 | 5.6 $\pm$ 3.7 |
| ADG score up to one year prior to treatment start, median (IQR)                                  | 5 (3-8)       | 5 (3-8)       |
| <b>Number of ADG categories up to one year prior to treatment start, N (% of total in stage)</b> |               |               |
| 0                                                                                                | 10 (4.8%)     | 35 (3.5%)     |
| 1-4                                                                                              | 78 (37.7%)    | 406 (40.5%)   |
| 5-9                                                                                              | 87 (42.0%)    | 417 (40.5%)   |
| 10+                                                                                              | 32 (15.5%)    | 144 (14.4%)   |
| <b>Mental health record, N (% of total in stage)</b>                                             |               |               |
| <b>Substance use and addictive disorders</b>                                                     |               |               |
| Prior to treatment start                                                                         | 155 (74.9%)   | 840 (83.8%)   |
| Prior to Dec 31, 2013/2018                                                                       | 163 (78.7%)   | 858 (85.6%)   |
| <b>Mood disorders</b>                                                                            |               |               |
| Prior to treatment start                                                                         | 98 (47.3%)    | 499 (49.8%)   |
| Prior to Dec 31, 2013/2018                                                                       | 108 (52.2%)   | 539 (53.8%)   |
| <b>Personality disorders</b>                                                                     |               |               |
| Prior to treatment start                                                                         | 47 (22.7%)    | 221 (22.1%)   |
| Prior to Dec 31, 2013/2018                                                                       | 52 (25.1%)    | 232 (23.2%)   |
| <b>Schizophrenia spectrum and other psychotic disorders</b>                                      |               |               |
| Prior to treatment start                                                                         | 30 (14.5%)    | 192 (19.2%)   |
| Prior to Dec 31, 2013/2018                                                                       | 38 (18.4%)    | 213 (21.3%)   |
| <b>Anxiety disorders</b>                                                                         |               |               |
| Prior to treatment start                                                                         | 181 (87.4%)   | 855 (85.3%)   |
| Prior to Dec 31, 2013/2018                                                                       | 187 (90.3%)   | 875 (87.3%)   |
| <b>Trauma/stressor-related disorders</b>                                                         |               |               |
| Prior to treatment start                                                                         | 55 (26.6%)    | 346 (34.5%)   |
| Prior to Dec 31, 2013/2018                                                                       | 64 (30.9%)    | 379 (37.8%)   |
| <b>Deliberate self harm</b>                                                                      |               |               |
| Prior to treatment start                                                                         | 29 (14.0%)    | 215 (21.5%)   |
| Prior to Dec 31, 2013/2018                                                                       | 41 (19.8%)    | 236 (23.6%)   |
| <b>Disease-Specific records, N (% of total in stage)</b>                                         |               |               |
| <b>Genotype of Infection</b>                                                                     |               |               |
| Genotype 1                                                                                       | 123 (59.4%)   | 665 (66.4%)   |
| Genotype 2                                                                                       | 28 (13.5%)    | 70 (7.0%)     |
| Genotype 3                                                                                       | 46 (22.2%)    | 217 (21.7%)   |
| Genotype 4                                                                                       | 0 (0.0%)      | $\leq$ 5      |
| Multiple Genotypes                                                                               | $\leq$ 5      | $\leq$ 5      |
| Missing/Unknown Result                                                                           | $\leq$ 9      | 43 (4.3%)     |
| <b>Hepatitis B record</b>                                                                        |               |               |
| Prior to treatment start                                                                         | $\leq$ 5      | 31 (3.1%)     |
| Prior to Dec 31, 2013/2018                                                                       | 7 (3.4%)      | 32 (3.2%)     |
| <b>HIV record</b>                                                                                |               |               |
| Prior to treatment start                                                                         | 10 (4.8%)     | 44 (4.4%)     |
| Prior to Dec 31, 2013/2018                                                                       | 10 (4.8%)     | 47 (4.7%)     |
| <b>Cirrhosis record</b>                                                                          |               |               |
| Prior to treatment start                                                                         | 22 (10.6%)    | 94 (9.4%)     |
| Prior to Dec 31, 2013/2018                                                                       | 29 (14.0%)    | 119 (11.9%)   |
| <b>Decompensated cirrhosis</b>                                                                   |               |               |
| Prior to treatment start                                                                         | 15 (7.2%)     | 61 (6.1%)     |
| Prior to Dec 31, 2013/2018                                                                       | 16 (7.7%)     | 67 (6.7%)     |
| <b>Hepatocellular carcinoma</b>                                                                  |               |               |
| Prior to treatment start                                                                         | $\leq$ 5      | 6 (0.6%)      |
| Prior to Dec 31, 2013/2018                                                                       | $\leq$ 5      | 9 (0.9%)      |
| <b>Liver transplant</b>                                                                          |               |               |

Appendix 6, as submitted by the authors. Appendix to: Mendlowitz AB, Bremner KE, Krahn M, et al. Characterizing the cascade of care for hepatitis C virus infection among Status First Nations peoples in Ontario: a retrospective cohort study. *CMAJ* 2023. doi: 10.1503/cmaj.220717. Copyright © 2023 The Author(s) or their employer(s). To receive this resource in an accessible format, please contact us at cmajgroup@cmaj.ca.

|                            |     |           |
|----------------------------|-----|-----------|
| Prior to treatment start   | <=5 | 6 (0.6%)  |
| Prior to Dec 31, 2013/2018 | <=5 | 10 (1.0%) |

Notes: Individuals who initiated treatment by December 31, 2013 were also included in the group that initiated treatment by December 31, 2018. Cell sizes <=5 cannot be reported or able to be recalculated to comply with ICES privacy rules. ADG score was derived using the John Hopkins ACG® system [Johns Hopkins ACG® System [Internet]. Johns Hopkins ACG® System. [cited 2019 Feb 7]. Available from: <https://www.hopkinsacg.org/>].

\*Includes individuals for whom this variable indicated residence outside of Ontario during year of assessment. Ontario residence for the initial exclusion criteria was determined using the registered persons database (RPDB) rather than the residence within/outside of First Nations community database.

†Categories do not add up to total because a few individuals had both an interferon and DAA treatment claim at first treatment dispensation date.

‡Includes individuals who were backfilled into the treatment stage.

Abbreviations: ADG, aggregated diagnosis groups; DAA, direct-acting antiviral; HBV, hepatitis B virus; HIV, human immunodeficiency virus; IQR, interquartile range; LHIN, local health integration network; SD, standard deviation.

**Table S11. Demographic and clinical characteristics of Status First Nations people in Ontario for each cascade of care stage on December 31, 2013.**

| Characteristic                                                  | Antibody Positive | HCV RNA Tested | HCV RNA Positive | Genotyped     | Initiated Treatment | Achieved SVR |
|-----------------------------------------------------------------|-------------------|----------------|------------------|---------------|---------------------|--------------|
| Total, N                                                        | N=3,146           | N=2,196        | N=1,406          | N=1,344       | N=207               | N=162        |
| Age at index date, years (Mean ± SD)                            | 36.4 ± 11.7       | 36.9 ± 11.7    | 37.4 ± 10.7      | 37.4 ± 10.6   | 39.3 ± 9.6          | 39.1 ± 9.5   |
| Age at index date, years (Median (IQR))                         | 36 (28-44)        | 37 (28-45)     | 38 (29-45)       | 38 (29-45)    | 40 (32-46)          | 40 (31-46)   |
| <b>Age at index date, years, N (% of total in stage)</b>        |                   |                |                  |               |                     |              |
| 0-24                                                            | 489 (15.5%)       | 334 (15.2%)    | 178 (12.7%)      | 170 (12.6%)   | 16 (7.7%)           | <=13         |
| 25-29                                                           | 417 (13.3%)       | 280 (12.8%)    | 193 (13.7%)      | 183 (13.6%)   | 20 (9.7%)           | 19 (11.7%)   |
| 30-34                                                           | 449 (14.3%)       | 289 (13.2%)    | 195 (13.9%)      | 188 (14.0%)   | 26 (12.6%)          | 22 (13.6%)   |
| 35-39                                                           | 506 (16.1%)       | 339 (15.4%)    | 224 (15.9%)      | 210 (15.6%)   | 35 (16.9%)          | 25 (15.4%)   |
| 40-44                                                           | 507 (16.1%)       | 362 (16.5%)    | 242 (17.2%)      | 234 (17.4%)   | 44 (21.3%)          | 36 (22.2%)   |
| 45-49                                                           | 376 (12.0%)       | 284 (12.9%)    | 187 (13.3%)      | 181 (13.5%)   | 36 (17.4%)          | 27 (16.7%)   |
| 50-54                                                           | 234 (7.4%)        | 177 (8.1%)     | 115 (8.2%)       | 112 (8.3%)    | 23 (11.1%)          | 19 (11.7%)   |
| 55+                                                             | 168 (5.3%)        | 131 (6.0%)     | 72 (5.1%)        | 66 (4.9%)     | 7 (3.4%)            | <=5          |
| <b>Birth Cohort N (% of total in stage)</b>                     |                   |                |                  |               |                     |              |
| <1945                                                           | 34 (1.1%)         | 25 (1.1%)      | 16 (1.1%)        | 13 (1.0%)     | <=5                 | <=5          |
| 1945 to 1964                                                    | 1,080 (34.3%)     | 814 (37.1%)    | 547 (38.9%)      | 529 (39.4%)   | 110 (53.1%)         | 84 (51.9%)   |
| 1965 to 1975                                                    | 970 (30.8%)       | 669 (30.5%)    | 431 (30.7%)      | 410 (30.5%)   | 59 (28.5%)          | 47 (29.0%)   |
| >1975                                                           | 1,062 (33.8%)     | 688 (31.3%)    | 412 (29.3%)      | 392 (29.2%)   | <=37                | <=30         |
| <b>Sex, N (% of total in stage)</b>                             |                   |                |                  |               |                     |              |
| Female                                                          | 1,448 (46.0%)     | 1,047 (47.7%)  | 588 (41.8%)      | 553 (41.1%)   | 98 (47.3%)          | 74 (45.7%)   |
| Male                                                            | 1,698 (54.0%)     | 1,149 (52.3%)  | 818 (58.2%)      | 791 (58.9%)   | 109 (52.7%)         | 88 (54.3%)   |
| <b>Urbanicity at index date, N (% of total in stage)</b>        |                   |                |                  |               |                     |              |
| Missing/Unknown                                                 | 32 (1.0%)         | 15 (0.7%)      | 10 (0.7%)        | 10 (0.7%)     | 0 (0.0%)            | 0 (0.0%)     |
| Urban                                                           | 2,366 (75.2%)     | 1,632 (74.3%)  | 1,065 (75.7%)    | 1,019 (75.8%) | 174 (84.1%)         | 135 (83.3%)  |
| Rural                                                           | 748 (23.8%)       | 549 (25.0%)    | 331 (23.5%)      | 315 (23.4%)   | 33 (15.9%)          | 27 (16.7%)   |
| <b>Community status at index date, N (% of total in stage)*</b> |                   |                |                  |               |                     |              |
| Missing/Unknown                                                 | 324 (10.3%)       | 243 (11.1%)    | 172 (12.2%)      | 167 (12.4%)   | 43 (20.8%)          | 30 (18.5%)   |
| Outside of First Nations community                              | 2,436 (77.4%)     | 1,671 (76.1%)  | 1,057 (75.2%)    | 1,012 (75.3%) | 155 (74.9%)         | 124 (76.5%)  |
| Within First Nations community                                  | 386 (12.3%)       | 282 (12.8%)    | 177 (12.6%)      | 165 (12.3%)   | 9 (4.3%)            | 8 (4.9%)     |
| <b>LHIN at index date, N (% of total in stage)</b>              |                   |                |                  |               |                     |              |
| Missing/Unknown                                                 | 30 (1.0%)         | 13 (0.6%)      | 9 (0.6%)         | 9 (0.7%)      | 0 (0.0%)            | 0 (0.0%)     |
| 1. Erie St Clair                                                | 191 (6.1%)        | 121 (5.5%)     | 70 (5.0%)        | 68 (5.1%)     | 12 (5.8%)           | 10 (6.2%)    |
| 2. South West                                                   | 274 (8.7%)        | 180 (8.2%)     | 115 (8.2%)       | 110 (8.2%)    | 22 (10.6%)          | 17 (10.5%)   |
| 3. Waterloo Wellington                                          | 43 (1.4%)         | 36 (1.6%)      | 26 (1.8%)        | 24 (1.8%)     | 7 (3.4%)            | <=5          |
| 4. Hamilton Niagara Haldimand Brant                             | 342 (10.9%)       | 250 (11.4%)    | 177 (12.6%)      | 164 (12.2%)   | 20 (9.7%)           | 16 (9.9%)    |
| 5. Central West                                                 | 32 (1.0%)         | 27 (1.2%)      | 15 (1.1%)        | 14 (1.0%)     | <=5                 | <=5          |
| 6. Mississauga Halton                                           | 28 (0.9%)         | 21 (1.0%)      | 14 (1.0%)        | 12 (0.9%)     | <=5                 | <=5          |

Appendix 6, as submitted by the authors. Appendix to: Mendlowitz AB, Bremner KE, Krahn M, et al. Characterizing the cascade of care for hepatitis C virus infection among Status First Nations peoples in Ontario: a retrospective cohort study. *CMAJ* 2023. doi: 10.1503/cmaj.220717. Copyright © 2023 The Author(s) or their employer(s). To receive this resource in an accessible format, please contact us at [cmajgroup@cmaj.ca](mailto:cmajgroup@cmaj.ca).

|                                                                                             |               |               |               |               |               |               |
|---------------------------------------------------------------------------------------------|---------------|---------------|---------------|---------------|---------------|---------------|
| 7. Toronto Central                                                                          | 297 (9.4%)    | 201 (9.2%)    | 130 (9.2%)    | 127 (9.4%)    | 29 (14.0%)    | 24 (14.8%)    |
| 8. Central                                                                                  | 42 (1.3%)     | 36 (1.6%)     | 22 (1.6%)     | 21 (1.6%)     | 7 (3.4%)      | <=5           |
| 9. Central East                                                                             | 115 (3.7%)    | 83 (3.8%)     | 50 (3.6%)     | 48 (3.6%)     | 16 (7.7%)     | 11 (6.8%)     |
| 10. South East                                                                              | 90 (2.9%)     | 63 (2.9%)     | 44 (3.1%)     | 44 (3.3%)     | 11 (5.3%)     | 7 (4.3%)      |
| 11. Champlain                                                                               | 170 (5.4%)    | 107 (4.9%)    | 70 (5.0%)     | 66 (4.9%)     | <=5           | <=5           |
| 12. North Simcoe Muskoka                                                                    | 81 (2.6%)     | 53 (2.4%)     | 33 (2.3%)     | 30 (2.2%)     | <=5           | <=5           |
| 13. North East                                                                              | 618 (19.6%)   | 461 (21.0%)   | 299 (21.3%)   | 289 (21.5%)   | 44 (21.3%)    | 36 (22.2%)    |
| 14. North West                                                                              | 793 (25.2%)   | 544 (24.8%)   | 332 (23.6%)   | 318 (23.7%)   | 28 (13.5%)    | 23 (14.2%)    |
| <b>Comorbidities</b>                                                                        |               |               |               |               |               |               |
| ADG score up to one year prior to index date, mean $\pm$ SD                                 | 5.4 $\pm$ 3.8 | 5.3 $\pm$ 3.7 | 5.4 $\pm$ 3.7 | 5.3 $\pm$ 3.6 | 5.3 $\pm$ 3.6 | 5.3 $\pm$ 3.8 |
| ADG score up to one year prior to index date, median (IQR)                                  | 5 (2-8)       | 5 (2-8)       | 5 (2-8)       | 5 (2-8)       | 5 (3-7)       | 5 (2-7)       |
| <b>Number of ADG categories up to one year prior to index date, N (% of total in stage)</b> |               |               |               |               |               |               |
| 0                                                                                           | 251 (8.0%)    | 173 (7.9%)    | 106 (7.5%)    | 100 (7.4%)    | 14 (6.8%)     | 13 (8.0%)     |
| 1-4                                                                                         | 1,204 (38.3%) | 835 (38.0%)   | 524 (37.3%)   | 509 (37.9%)   | 77 (37.2%)    | 60 (37.0%)    |
| 5-9                                                                                         | 1,219 (38.7%) | 870 (39.6%)   | 579 (41.2%)   | 549 (40.8%)   | 89 (43.0%)    | 67 (41.4%)    |
| 10+                                                                                         | 472 (15.0%)   | 318 (14.5%)   | 197 (14.0%)   | 186 (13.8%)   | 27 (13.0%)    | 22 (13.6%)    |
| <b>Mental health record, N (% of total in stage)</b>                                        |               |               |               |               |               |               |
| <b>Substance use and addictive disorders</b>                                                |               |               |               |               |               |               |
| Prior to index date                                                                         | 2,194 (69.7%) | 1,474 (67.1%) | 978 (69.6%)   | 936 (69.6%)   | 136 (65.7%)   | 101 (62.3%)   |
| Prior to Dec 31, 2013                                                                       | 2,530 (80.4%) | 1,718 (78.2%) | 1,141 (81.2%) | 1,094 (81.4%) | 163 (78.7%)   | 123 (75.9%)   |
| <b>Mood disorders</b>                                                                       |               |               |               |               |               |               |
| Prior to index date                                                                         | 1,064 (33.8%) | 741 (33.7%)   | 466 (33.1%)   | 446 (33.2%)   | 66 (31.9%)    | 47 (29.0%)    |
| Prior to Dec 31, 2013                                                                       | 1,482 (47.1%) | 1,040 (47.4%) | 674 (47.9%)   | 646 (48.1%)   | 108 (52.2%)   | 80 (49.4%)    |
| <b>Personality disorders</b>                                                                |               |               |               |               |               |               |
| Prior to index date                                                                         | 542 (17.2%)   | 366 (16.7%)   | 253 (18.0%)   | 241 (17.9%)   | 34 (16.4%)    | 26 (16.0%)    |
| Prior to Dec 31, 2013                                                                       | 723 (23.0%)   | 494 (22.5%)   | 343 (24.4%)   | 330 (24.6%)   | 52 (25.1%)    | 41 (25.3%)    |
| <b>Schizophrenia spectrum and other psychotic disorders</b>                                 |               |               |               |               |               |               |
| Prior to index date                                                                         | 340 (10.8%)   | 228 (10.4%)   | 161 (11.5%)   | 154 (11.5%)   | 18 (8.7%)     | 14 (8.6%)     |
| Prior to Dec 31, 2013                                                                       | 544 (17.3%)   | 368 (16.8%)   | 259 (18.4%)   | 248 (18.5%)   | 38 (18.4%)    | 29 (17.9%)    |
| <b>Anxiety disorders</b>                                                                    |               |               |               |               |               |               |
| Prior to index date                                                                         | 2,394 (76.1%) | 1,680 (76.5%) | 1,098 (78.1%) | 1,050 (78.1%) | 169 (81.6%)   | 127 (78.4%)   |
| Prior to Dec 31, 2013                                                                       | 2,672 (84.9%) | 1,870 (85.2%) | 1,225 (87.1%) | 1,173 (87.3%) | 187 (90.3%)   | 144 (88.9%)   |
| <b>Trauma/stressor-related disorders</b>                                                    |               |               |               |               |               |               |
| Prior to index date                                                                         | 668 (21.2%)   | 461 (21.0%)   | 299 (21.3%)   | 291 (21.7%)   | 41 (19.8%)    | 36 (22.2%)    |
| Prior to Dec 31, 2013                                                                       | 972 (30.9%)   | 679 (30.9%)   | 459 (32.6%)   | 443 (33.0%)   | 64 (30.9%)    | 54 (33.3%)    |
| <b>Deliberate self harm</b>                                                                 |               |               |               |               |               |               |
| Prior to index date                                                                         | 399 (12.7%)   | 265 (12.1%)   | 185 (13.2%)   | 172 (12.8%)   | 17 (8.2%)     | 15 (9.3%)     |
| Prior to Dec 31, 2013                                                                       | 671 (21.3%)   | 457 (20.8%)   | 331 (23.5%)   | 316 (23.5%)   | 41 (19.8%)    | 31 (19.1%)    |

Appendix 6, as submitted by the authors. Appendix to: Mendlowitz AB, Bremner KE, Krahn M, et al. Characterizing the cascade of care for hepatitis C virus infection among Status First Nations peoples in Ontario: a retrospective cohort study. *CMAJ* 2023. doi: 10.1503/cmaj.220717. Copyright © 2023 The Author(s) or their employer(s). To receive this resource in an accessible format, please contact us at cmajgroup@cmaj.ca.

| <b>Disease-Specific records, N (% of total in stage)</b> |              |             |             |             |             |            |
|----------------------------------------------------------|--------------|-------------|-------------|-------------|-------------|------------|
| <b>Genotype of Infection</b>                             |              |             |             |             |             |            |
| Genotype 1                                               | 950 (30.2%)  | 950 (43.3%) | 923 (65.6%) | 923 (68.7%) | 123 (59.4%) | 94 (58.0%) |
| Genotype 2                                               | 118 (3.8%)   | 118 (5.4%)  | 109 (7.8%)  | 109 (8.1%)  | 28 (13.5%)  | 26 (16.0%) |
| Genotype 3                                               | 301 (9.6%)   | 301 (13.7%) | 289 (20.6%) | 289 (21.5%) | 46 (22.2%)  | 34 (21.0%) |
| Genotype 4                                               | <=5          | <=5         | <=5         | <=5         | 0 (0.0%)    | 0 (0.0%)   |
| Multiple Genotypes                                       | <=16         | <=16        | <=13        | 11 (0.8%)   | <=5         | <=5        |
| Missing/Unknown Result                                   | 1760 (55.9%) | 810 (36.9%) | 71 (5.0%)   | <=11        | <=9         | <=7        |
| <b>Hepatitis B</b>                                       |              |             |             |             |             |            |
| Prior to index date                                      | 49 (1.6%)    | 38 (1.7%)   | 26 (1.8%)   | 24 (1.8%)   | <=5         | 0 (0.0%)   |
| Prior to Dec 31, 2013                                    | 92 (2.9%)    | 70 (3.2%)   | 48 (3.4%)   | 46 (3.4%)   | 7 (3.4%)    | <=5        |
| <b>HIV</b>                                               |              |             |             |             |             |            |
| Prior to index date                                      | 77 (2.4%)    | 64 (2.9%)   | 36 (2.6%)   | 34 (2.5%)   | 7 (3.4%)    | <=5        |
| Prior to Dec 31, 2013                                    | 145 (4.6%)   | 119 (5.4%)  | 78 (5.5%)   | 75 (5.6%)   | 10 (4.8%)   | 6 (3.7%)   |
| <b>Cirrhosis</b>                                         |              |             |             |             |             |            |
| Prior to index date                                      | 77 (2.4%)    | 64 (2.9%)   | 41 (2.9%)   | 40 (3.0%)   | 8 (3.9%)    | 7 (4.3%)   |
| Prior to Dec 31, 2013                                    | 178 (5.7%)   | 158 (7.2%)  | 123 (8.7%)  | 121 (9.0%)  | 29 (14.0%)  | 22 (13.6%) |
| <b>Decompensated cirrhosis</b>                           |              |             |             |             |             |            |
| Prior to index date                                      | 53 (1.7%)    | 48 (2.2%)   | 30 (2.1%)   | 29 (2.2%)   | <=5         | <=5        |
| Prior to Dec 31, 2013                                    | 109 (3.5%)   | 102 (4.6%)  | 77 (5.5%)   | 76 (5.7%)   | 16 (7.7%)   | 11 (6.8%)  |
| <b>Hepatocellular carcinoma</b>                          |              |             |             |             |             |            |
| Prior to index date                                      | 0 (0.0%)     | 0 (0.0%)    | 0 (0.0%)    | 0 (0.0%)    | 0 (0.0%)    | 0 (0.0%)   |
| Prior to Dec 31, 2013                                    | 11 (0.3%)    | 10 (0.5%)   | 8 (0.6%)    | 8 (0.6%)    | <=5         | <=5        |
| <b>Liver transplant</b>                                  |              |             |             |             |             |            |
| Prior to index date                                      | <=5          | <=5         | <=5         | <=5         | 0 (0.0%)    | 0 (0.0%)   |
| Prior to Dec 31, 2013                                    | 14 (0.4%)    | 14 (0.6%)   | 11 (0.8%)   | 11 (0.8%)   | <=5         | <=5        |

Notes: Cell sizes <=5 cannot be reported or able to be recalculated to comply with ICES privacy rules.

\*Includes individuals for whom this variable indicated residence outside of Ontario during year of assessment. Ontario residence for the initial exclusion criteria was determined using the registered persons database (RPDB) rather than the residence within/outside of First Nations community database. ADG score was derived using the John Hopkins ACG® system [Johns Hopkins ACG® System [Internet]. Johns Hopkins ACG® System. [cited 2019 Feb 7]. Available from: <https://www.hopkinsacg.org/>]

Abbreviations: ADG, aggregated diagnosis groups; HBV, hepatitis B virus; HIV, human immunodeficiency virus; LHIN, local health integration network; RNA, ribonucleic acid; SVR, sustained virologic response.

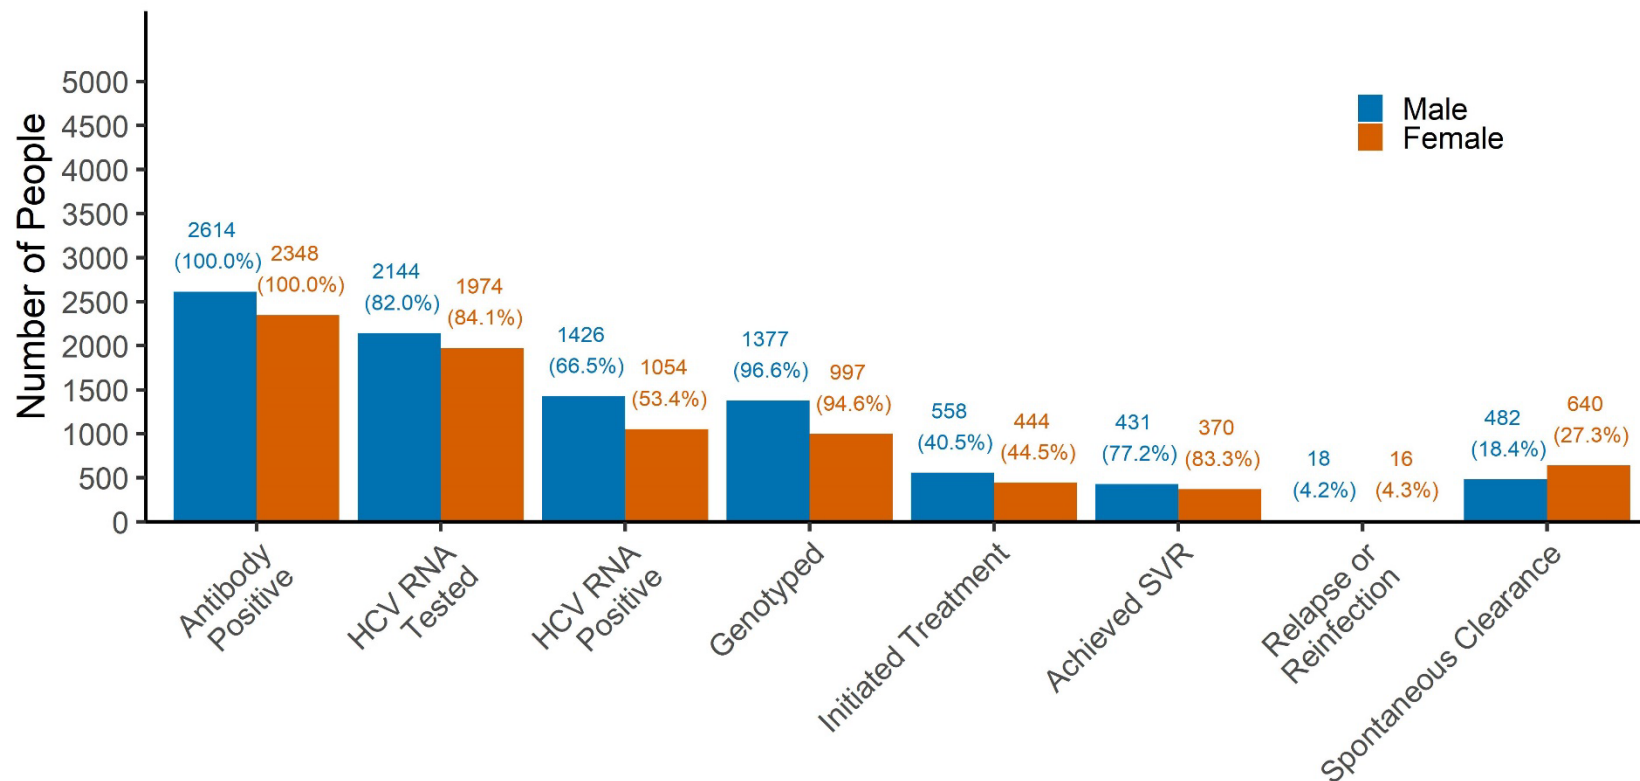

**Figure S1. Cascade of care stratified by sex on December 31, 2018.** The annotation above each bar describes the number of individuals and percentages of previous stage. For the spontaneous clearance stage, the annotation above the bar describes the percentage of the antibody positive stage.

Abbreviations: HCV, hepatitis C virus; RNA, ribonucleic acid; SVR, sustained virologic response.

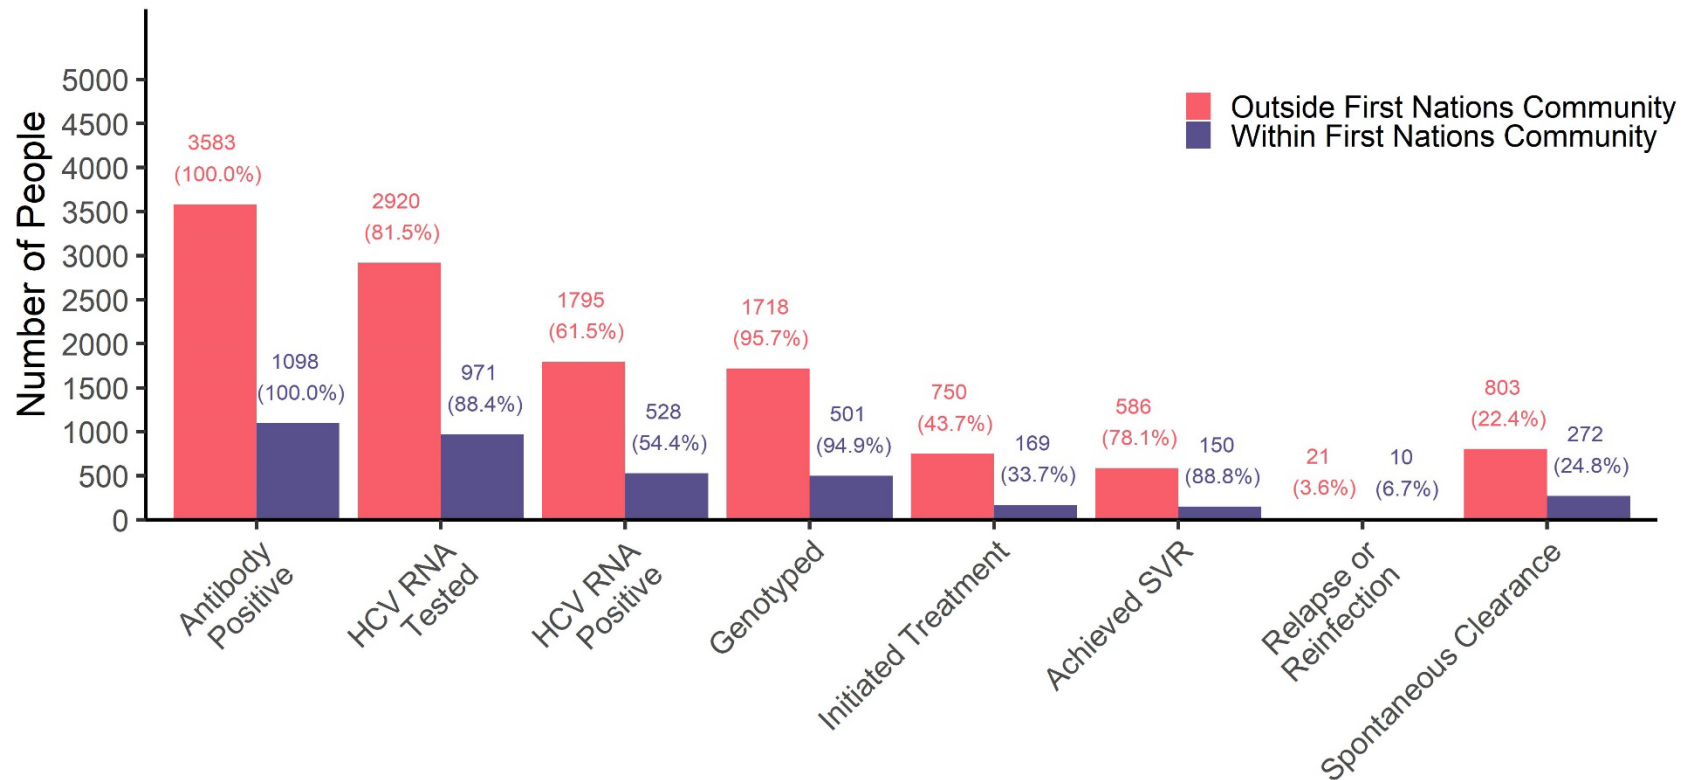

**Figure S2. Cascade of care stratified by residence within or outside of a First Nations community at first positive date, measured as of December 31, 2018.** The annotation above each bar describes the number of individuals and percentages of previous stage. For the spontaneous clearance stage, the annotation above the bar describes the percentage of the antibody positive stage. Abbreviations: HCV, hepatitis C virus; RNA, ribonucleic acid; SVR, sustained virologic response.





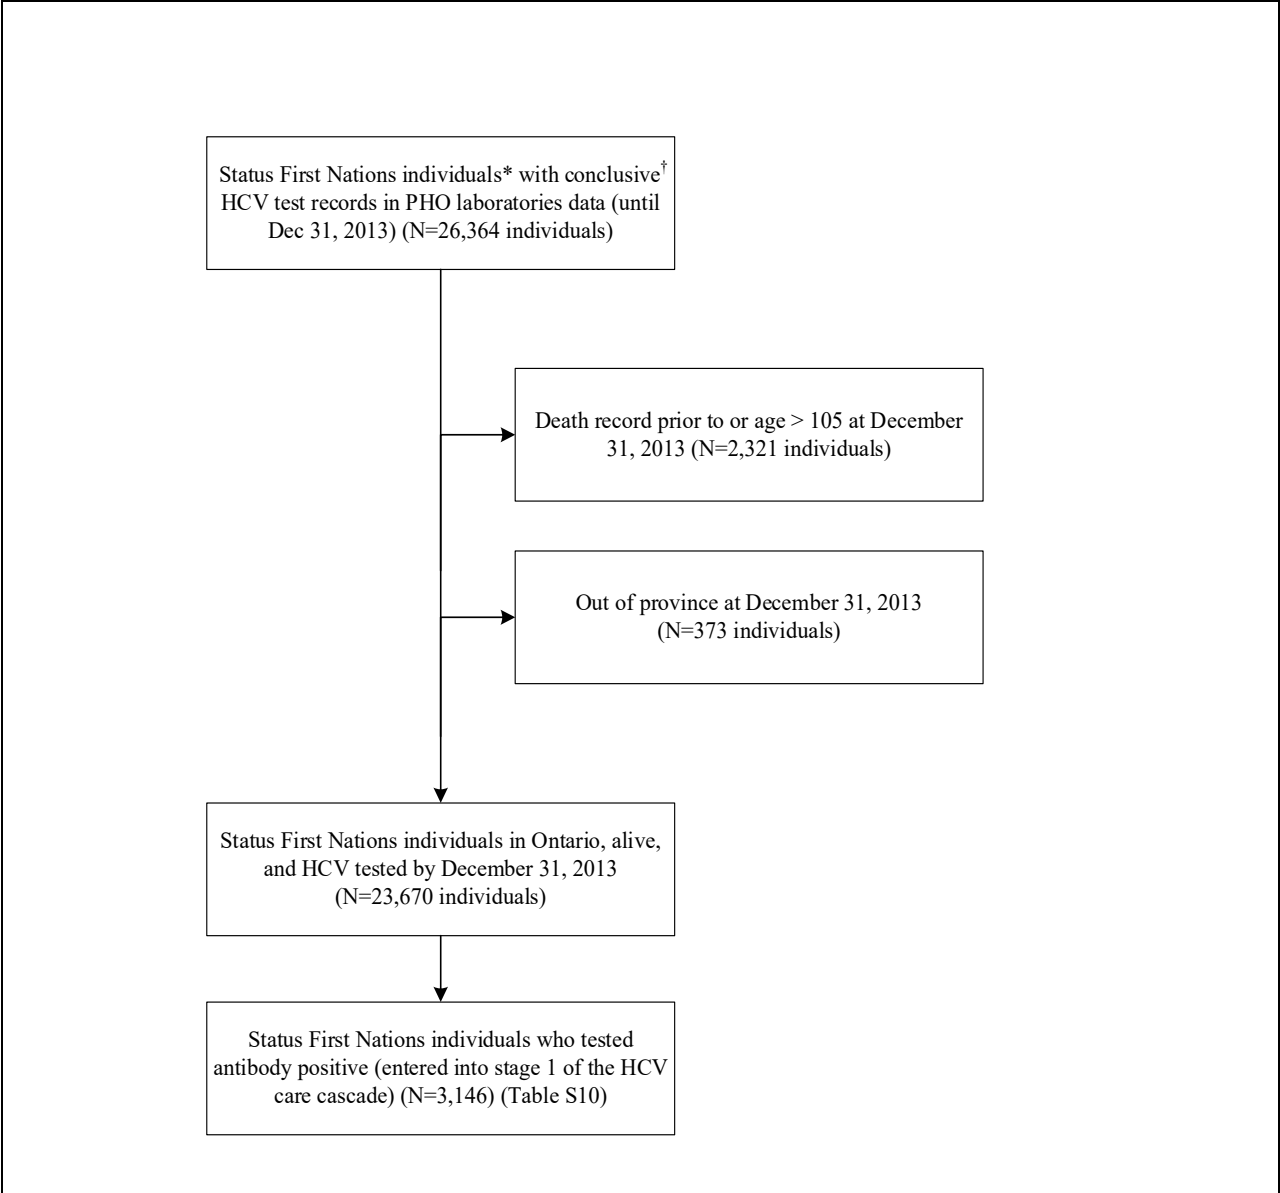

**Figure S3. Flow diagram showing cohort selection for cascade of care analysis on December 31, 2013.**

\*Members of the Kenora Chiefs Advisory were excluded from the analyses

†138 individuals had only inconclusive HCV antibody test results and no HCV RNA test record by December 31, 2013

Abbreviations: HCV, hepatitis C virus; PHO, Public Health Ontario



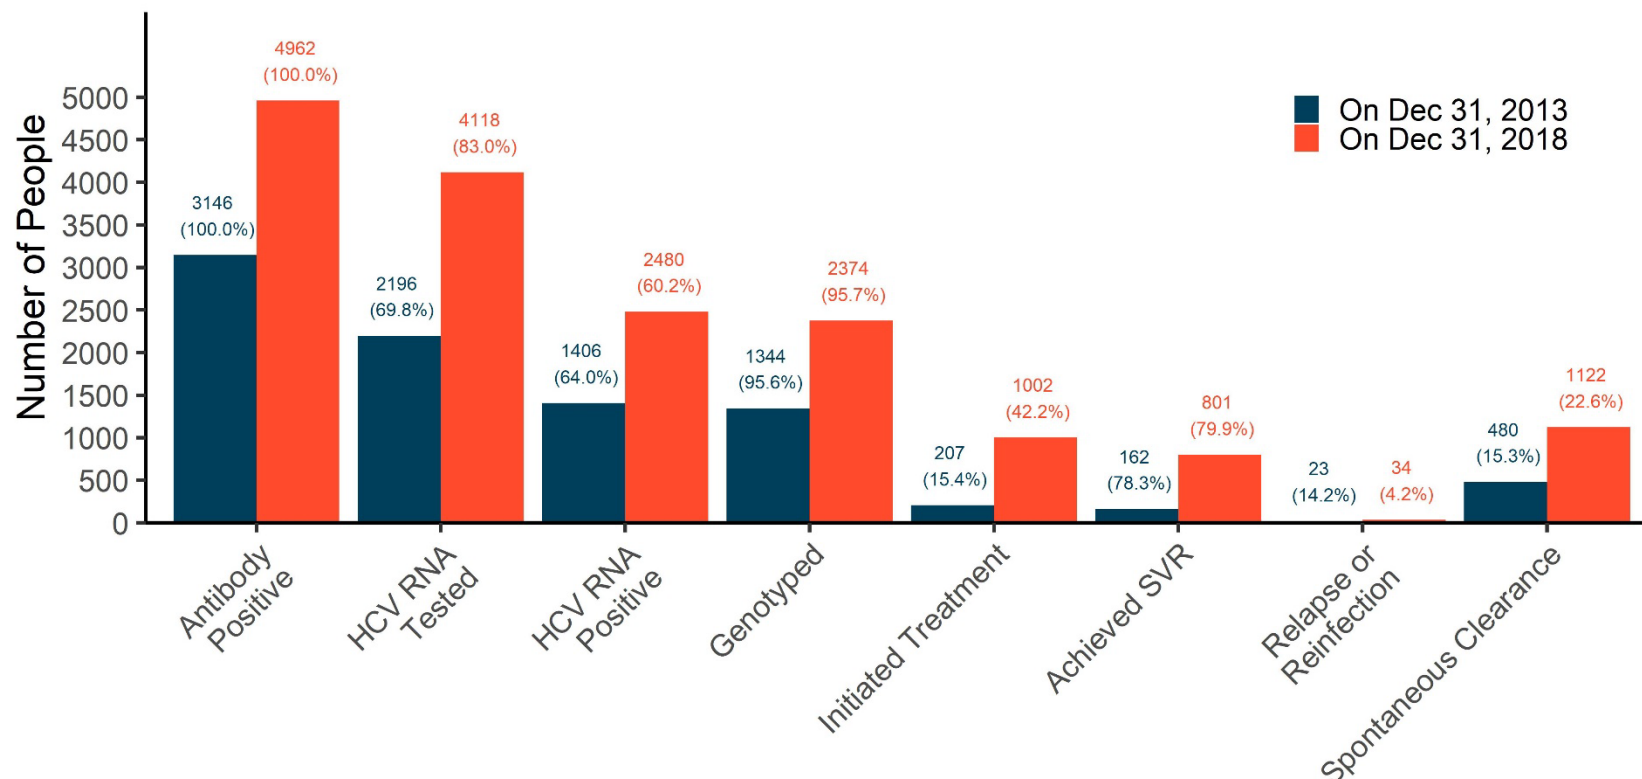

**Figure S4. Cascade of care measured on December 31, 2013 (pre-DAA treatment era) compared to on December 31, 2018.** The annotation above each bar describes the number of individuals and percentages of previous stage. For the spontaneous clearance stage, the annotation above the bar describes the percentage of the antibody positive stage. Cohort selection and demographics for the cascade on December 31, 2013 can be found in Appendix 6 Figure S3 and Table S11.

Abbreviations: HCV, hepatitis C virus; RNA, ribonucleic acid; SVR, sustained virologic response.

Appendix 6, as submitted by the authors. Appendix to: Mendlowitz AB, Bremner KE, Krahn M, et al. Characterizing the cascade of care for hepatitis C virus infection among Status First Nations peoples in Ontario: a retrospective cohort study. *CMAJ* 2023. doi: 10.1503/cmaj.220717. Copyright © 2023 The Author(s) or their employer(s). To receive this resource in an accessible format, please contact us at cmajgroup@cmaj.ca.
